# Supplementary material for: Chitosan based dielectrics for use in single walled carbon nanotube-based thin film transistors
Source: Royal Society of Chemistry journal article supplement (doi:10.1039/d2tc04458g), 2023-01-01
Supplement: d2tc04458g1.pdf [file d2tc04458g1.pdf]

### Supporting information

## Chitosan based dielectrics for use in single walled carbon nanotube-based thin film Transistors

Bahar Ronnasi<sup>1</sup>, Mathieu N. Tousignant<sup>1</sup>, and Benoît H. Lessard<sup>1,2\*</sup>

1. University of Ottawa, Department of Chemical and Biological Engineering, 161 Louis Pasteur, Ottawa, ON, Canada
2. University of Ottawa, School of Electrical Engineering and Computer Science, 800 King Edward Ave. Ottawa, ON, Canada

Figure S1. AFM image of the SWCNT network when depositing a) 1 drop and b) 2 drops of the semiconducting ink on the channel, and the processed AFM images used in carbon nanotube linear density calculations for c) 1 drop and d) 2 drops of SWCNT deposited.

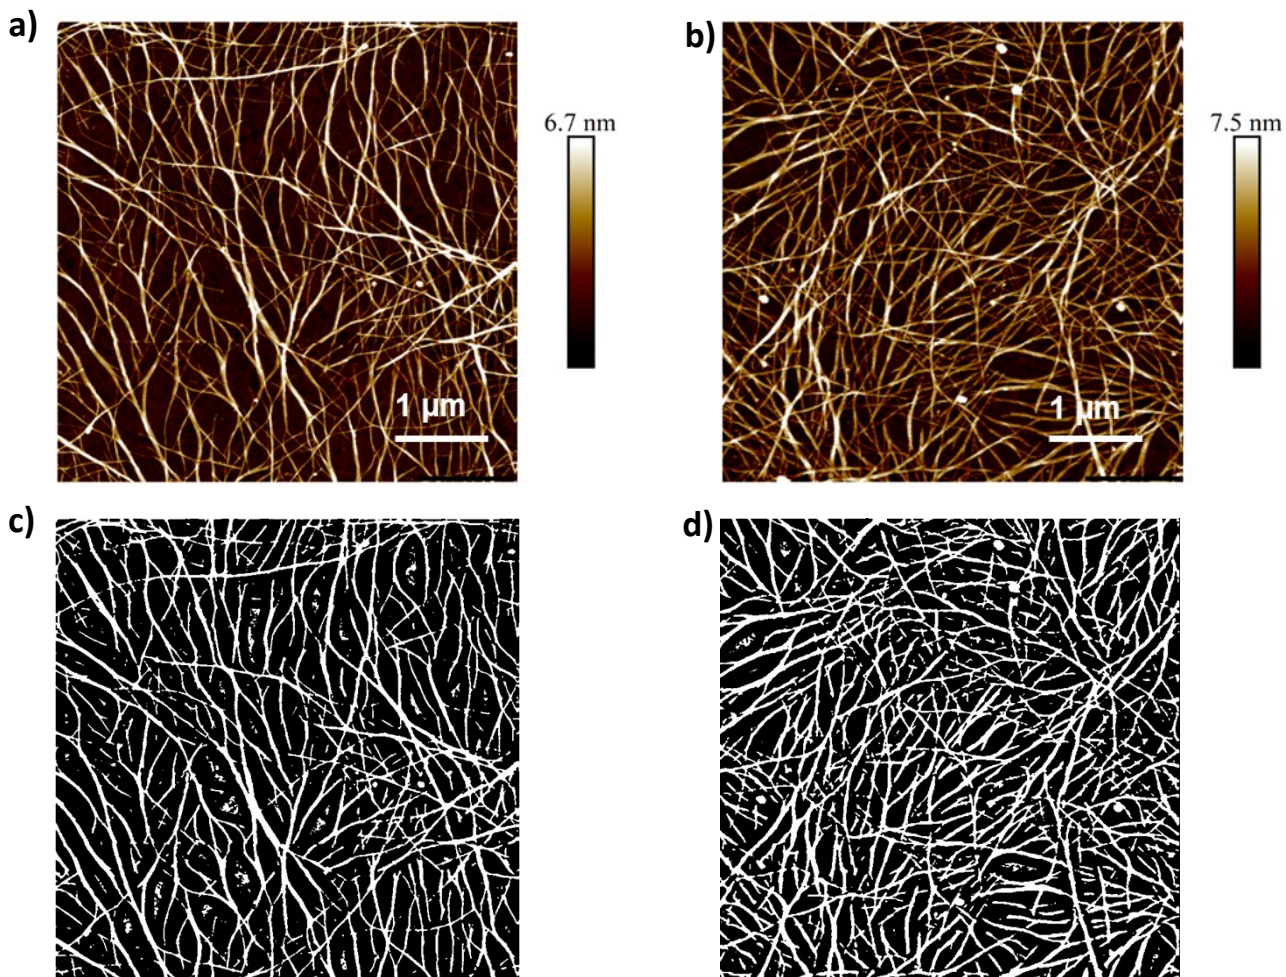

Table S1. The thickness and dielectric constant of capacitors fabricated with a solution of 1% chitosan in various acid concentrations.

| Acid Concentration | Dielectric Constant | thickness (nm) |
|--------------------|---------------------|----------------|
| 1% AA              | 110.5 ± 38.1        | 250.1          |
| 2.5% AA            | 149.4 ± 56.9        | 200            |
| 5% AA              | 238.4 ± 73.8        | 186.2          |

Table S2. The thickness and dielectric constant of capacitors fabricated with a solution of 2% chitosan in various acid concentrations.

| Acid Concentration | Dielectric Constant | thickness (nm) |
|--------------------|---------------------|----------------|
| 2% AA              | 13.8 ± 3.1          | 762.1          |
| 5% AA              | 59.1504 ± 12.1      | 630.7          |
| 10% AA             | 167.4138 ± 53.3     | 664.4          |

Table S3. The mobility and capacitance density values calculated using the parallel plate model vs. Cao model at 10Hz (the testing frequency).

| Fabrication conditions | SWCNT Linear Density ( $\mu\text{m}^{-1}$ ) | $C_{\text{Cao}}$ (nF. $\text{mm}^{-2}$ ) | $C_{\text{PP}^*}$ (nF. $\text{mm}^{-2}$ ) | Hole mobility PP ( $\text{cm}^2.\text{V}^{-1}\text{s}^{-1}$ ) | Hole mobility Cao ( $\text{cm}^2.\text{V}^{-1}\text{s}^{-1}$ ) |
|------------------------|---------------------------------------------|------------------------------------------|-------------------------------------------|---------------------------------------------------------------|----------------------------------------------------------------|
| 5%AA - 1 drop NT       | 5.42                                        | 0.25                                     | 0.31                                      | 18.5                                                          | 20.9                                                           |
| 5%AA - 2 drops NT      | 6.19                                        | 0.27                                     | 0.31                                      | 36.9                                                          | 41.7                                                           |
| 2%AA – 1 drop NT       | 5.42                                        | 0.19                                     | 0.22                                      | 9.4                                                           | 10.3                                                           |
| 2%AA – 2 drops NT      | 6.19                                        | 0.20                                     | 0.22                                      | 7.3                                                           | 7.9                                                            |

\* PP: Parallel plate
